# Supplementary material for: Systematic review of copper intrauterine contraception continuation in young nulliparous women based on intrauterine device type
Source: HighWire-hosted journal article supplement (doi:10.1136/bmjopen-2021-060606), 2022-10-01
Supplement: bmjopen-2021-060606supp003_data_supplement.pdf [file bmjopen-2021-060606supp003_data_supplement.pdf]

**Table** – Search Strategies

| Databases and additional sources search                                                                                                                                                                                                                                                                                                                                                                                                                                                                                     | Search term(s) used                                                                                                                | Limits                              | Records identified |
|-----------------------------------------------------------------------------------------------------------------------------------------------------------------------------------------------------------------------------------------------------------------------------------------------------------------------------------------------------------------------------------------------------------------------------------------------------------------------------------------------------------------------------|------------------------------------------------------------------------------------------------------------------------------------|-------------------------------------|--------------------|
| Allied and Complementary Medicine (AMED)<br>British Nursing Index (BNI)<br>Cumulative Index to Nursing and Allied Health Literature (CINAHL)<br>Excerpta Medica Database (EMBASE)<br>Nursing and Allied Health Professionals Database (EMCARE)<br>Health Management Information Consortium (HMIC)<br>General Medical Database (MEDLINE)<br>Psychology and Allied Fields (PsychINFO)<br>PubMed                                                                                                                               | (copper intrauterine).ti,ab OR (copper intrauterine device).ti,ab OR (copper coil).ti,ab OR (copper IUD).ti,ab OR (copper T).ti,ab | Title, Abstract<br>English language | <b>725</b>         |
| The Cochrane Library<br>Database of Abstracts and Reviews of Effects (DARE)<br>Turning Research into Practice (TRIP)<br>Bandolier<br>National Electronic Library of Health<br>Medicines and Healthcare products Regulatory Agency (MHRA)<br>Faculty of Sexual and Reproductive Healthcare (FSRH)<br>Royal College of Obstetricians and Gynaecologists (RCOG)<br>Department of Health<br>National Institute for Health and Care Excellence (NICE)<br>Scottish Intercollegiate Guidelines,<br>World Health Organisation (WHO) | 'copper intrauterine'                                                                                                              | -                                   | <b>22</b>          |
| Google Scholar                                                                                                                                                                                                                                                                                                                                                                                                                                                                                                              | 'copper intrauterine device young nulliparous'                                                                                     | -                                   |                    |
