# Supplementary material for: Systematic review of copper intrauterine contraception continuation in young nulliparous women based on intrauterine device type
Source: HighWire-hosted journal article supplement (doi:10.1136/bmjopen-2021-060606), 2022-10-01
Supplement: bmjopen-2021-060606supp004_data_supplement.pdf [file bmjopen-2021-060606supp004_data_supplement.pdf]

**TCu 380A continuation at 12 months post-insertion – sensitivity analysis**

|                                                         |                                       |
|---------------------------------------------------------|---------------------------------------|
| <b>Subgroup 1 (Nulliparous women aged &lt;30 years)</b> | <b>(81.60% (95% CI 76.52-86.21%))</b> |
| Excluding Abraham et al. (<20)                          | 82.04% (95% CI 76.48-87.04%)          |
| Excluding Abraham et al. (20-25)                        | 78.01% (95% CI 66.60-87.74%)          |
| Excluding Hall and Kutler (18-30)                       | 81.83% (95% CI 76.66-86.49%)          |
|                                                         |                                       |
| <b>Subgroup 2 (Nulliparous women of any age)</b>        | <b>(80.97% (95% CI 76.04-85.48%))</b> |
| Excluding Abraham et al. (>25)                          | 81.99% (95% CI 79.19-84.63%)          |
| Excluding Akintomide et al. (15-37)                     | 81.94% (95% CI 79.41-84.34%)          |
| Excluding Roy et al. (14-33)                            | 80.12% (95% CI 73.92-85.70%)          |
|                                                         |                                       |
| <b>Overall effect size (all studies)</b>                | <b>(81.93% (95% CI 79.66-84.09%))</b> |
| Excluding Abraham et al. (<20)                          | 81.84% (95% CI 79.13-84.40%)          |
| Excluding Abraham et al. (20-25)                        | 81.44% (95% CI 78.16-84.53%)          |
| Excluding Hall and Kutler (18-30)                       | 81.87% (95% CI 79.60-84.03%)          |
| Excluding Abraham et al. (>25)                          | 81.57% (95% CI 78.38-84.58%)          |
| Excluding Akintomide et al. (15-37)                     | 82.14% (95% CI 79.87-84.31%)          |
| Excluding Roy et al. (14-33)                            | 80.92% (95% CI 76.93-84.64%)          |

**TCu 200 continuation at 12 months post-insertion – sensitivity analysis**

|                                                         |                                       |
|---------------------------------------------------------|---------------------------------------|
| <b>Subgroup 1 (Nulliparous women aged &lt;30 years)</b> | <b>(73.03% (95% CI 67.63-78.10%))</b> |
| Excluding Lewit (15-19)                                 | 75.26% (95% CI 73.90-76.59%)          |
| Excluding Lewit (20-24)                                 | 73.33% (95% CI 71.62-75.00%)          |
| Excluding Lewit (25-29)                                 | 71.78% (95% CI 70.30-73.24%)          |
|                                                         |                                       |
| <b>Subgroup 2 (Nulliparous women of any age)</b>        | <b>(76.51% (95% CI 72.67-80.14%))</b> |
| Excluding Roy et al. (14-33)                            | 76.83% (95% CI 72.49-80.91%)          |
| Excluding Luukkainen et al. (19-35)                     | 76.53% (95% CI 71.86-80.91%)          |
| Excluding Larsen et al. (15-44)                         | 76.85% (95% CI 72.79-80.67%)          |
| Excluding Ostergard and Gunning (18-34)                 | 76.84% (95% CI 72.76-80.69%)          |
| Excluding Lewit (30-34)                                 | 75.59% (95% CI 71.42-79.54%)          |
| Excluding Lewit (35-49)                                 | 75.20% (95% CI 71.98-78.29%)          |
| Excluding Liedholm and Sioberg (14-40)                  | 77.32% (95% CI 73.40-81.01%)          |
| Excluding Mishell et al. (14-33)                        | 76.84% (95% CI 72.51-80.91%)          |
|                                                         |                                       |
| <b>Overall effect size (all studies)</b>                | <b>(75.44% (95% CI 72.32-78.43%))</b> |
| Excluding Lewit (15-19)                                 | 76.43% (95% CI 73.71-79.04%)          |
| Excluding Lewit (20-24)                                 | 75.59% (95% CI 71.81-79.17%)          |
| Excluding Lewit (25-29)                                 | 76.16% (95% CI 71.60-78.56%)          |
| Excluding Roy et al. (14-33)                            | 75.56% (95% CI 72.16-78.81%)          |
| Excluding Luukkainen et al. (19-35)                     | 75.38% (95% CI 71.89-78.72%)          |
| Excluding Larsen et al. (15-44)                         | 75.60% (95% CI 72.34-78.70%)          |
| Excluding Ostergard and Gunning (18-34)                 | 75.59% (95% CI 72.33-78.71%)          |
| Excluding Lewit (30-34)                                 | 74.72% (95% CI 71.59-77.73%)          |

|                                        |                              |
|----------------------------------------|------------------------------|
| Excluding Lewit (35-49)                | 74.37% (95% CI 71.53-77.10%) |
| Excluding Liedholm and Sioberg (14-40) | 75.87% (95% CI 72.61-78.98%) |
| Excluding Mishell et al. (14-33)       | 75.56% (95% CI 72.16-78.81%) |

#### TCu 200 discontinuation at 12 months due to pain/bleeding – sensitivity analysis

|                                                         |                                      |
|---------------------------------------------------------|--------------------------------------|
| <b>Subgroup 1 (Nulliparous women aged &lt;30 years)</b> | <b>(7.05% (95% CI 5.59-8.65%))</b>   |
| Excluding Lewit (15-19)                                 | 7.31% (95% CI 6.52-8.14%)            |
| Excluding Lewit (20-24)                                 | 6.31% (95% CI 5.41-7.27%)            |
| Excluding Lewit (25-29)                                 | 7.88% (95% CI 7.02-8.78%)            |
|                                                         |                                      |
| <b>Subgroup 2 (Nulliparous women of any age)</b>        | <b>(12.77% (95% CI 8.48-17.78%))</b> |
| Excluding Roy et al. (14-33)                            | 13.10% (95% CI 8.10-19.06%)          |
| Excluding Luukkainen et al. (19-35)                     | 11.02% (95% CI 8.41-13.92%)          |
| Excluding Larsen et al. (15-44)                         | 12.40% (95% CI 7.87-17.76%)          |
| Excluding Ostergard and Gunning (18-34)                 | 12.86% (95% CI 8.20-18.35%)          |
| Excluding Lewit (30-34)                                 | 13.61% (95% CI 8.83-19.22%)          |
| Excluding Lewit (35-49)                                 | 13.79% (95% CI 9.10-19.25%)          |
| Excluding Liedholm and Sioberg (14-40)                  | 12.08% (95% CI 7.56-17.45%)          |
| Excluding Mishell et al. (14-33)                        | 13.13% (95% CI 8.13-19.08%)          |
|                                                         |                                      |
| <b>Overall effect size (all studies)</b>                | <b>(10.87% (95% CI 7.98-14.15%))</b> |
| Excluding Lewit (15-19)                                 | 11.37% (95% CI 8.08-15.12%)          |
| Excluding Lewit (20-24)                                 | 11.23% (95% CI 7.70-15.32%)          |
| Excluding Lewit (25-29)                                 | 11.52% (95% CI 8.34-15.14%)          |
| Excluding Roy et al. (14-33)                            | 10.90% (95% CI 7.77-14.47%)          |
| Excluding Luukkainen et al. (19-35)                     | 9.32% (95% CI 7.62-11.17%)           |
| Excluding Larsen et al. (15-44)                         | 10.51% (95% CI 7.58-13.86%)          |
| Excluding Ostergard and Gunning (18-34)                 | 10.78% (95% CI 7.77-14.20%)          |
| Excluding Lewit (30-34)                                 | 11.23% (95% CI 8.01-14.92%)          |
| Excluding Lewit (35-49)                                 | 11.34% (95% CI 8.17-14.94%)          |
| Excluding Liedholm and Sioberg (14-40)                  | 10.26% (95% CI 7.40-13.53%)          |
| Excluding Mishell et al. (14-33)                        | 10.92% (95% CI 7.78-14.50%)          |

#### TCu 200 discontinuation at 12 months due to expulsion – sensitivity analysis

|                                                         |                                      |
|---------------------------------------------------------|--------------------------------------|
| <b>Subgroup 1 (Nulliparous women aged &lt;30 years)</b> | <b>(10.52% (95% CI 7.17-14.41%))</b> |
| Excluding Lewit (15-19)                                 | 8.59% (95% CI 7.74-9.48%)            |
| Excluding Lewit (20-24)                                 | 11.21% (95% CI 10.03-12.44%)         |
| Excluding Lewit (25-29)                                 | 10.36% (95% CI 9.38-11.38%)          |
|                                                         |                                      |
| <b>Subgroup 2 (Nulliparous women of any age)</b>        | <b>(4.93% (95% CI 2.93-7.39%))</b>   |
| Excluding Roy et al. (14-33)                            | 4.85% (95% CI 2.57-7.78%)            |
| Excluding Luukkainen et al. (19-35)                     | 4.17% (95% CI 2.68-5.96%)            |
| Excluding Larsen et al. (15-44)                         | 4.92% (95% CI 2.79-7.58%)            |
| Excluding Ostergard and Gunning (18-34)                 | 4.80% (95% CI 2.69-7.46%)            |
| Excluding Lewit (30-34)                                 | 4.74% (95% CI 2.41-7.76%)            |
| Excluding Lewit (35-49)                                 | 5.24% (95% CI 3.03-7.99%)            |
| Excluding Liedholm and Sioberg (14-40)                  | 5.84% (95% CI 3.95-8.07%)            |

|                                          |                                    |
|------------------------------------------|------------------------------------|
| Excluding Mishell et al. (14-33)         | 4.85% (95% CI 2.57-7.77%)          |
|                                          |                                    |
| <b>Overall effect size (all studies)</b> | <b>(6.44% (95% CI 4.49-8.69%))</b> |
| Excluding Lewit (15-19)                  | 5.76% (95% CI 4.14-7.61%)          |
| Excluding Lewit (20-24)                  | 6.16% (95% CI 3.87-8.93%)          |
| Excluding Lewit (25-29)                  | 6.16% (95% CI 3.96-8.79%)          |
| Excluding Roy et al. (14-33)             | 6.55% (95% CI 4.47-8.99%)          |
| Excluding Luukkainen et al. (19-35)      | 6.01% (95% CI 3.98-8.42%)          |
| Excluding Larsen et al. (15-44)          | 6.54% (95% CI 4.51-8.91%)          |
| Excluding Ostergard and Gunning (18-34)  | 6.46% (95% CI 4.43-8.83%)          |
| Excluding Lewit (30-34)                  | 6.47% (95% CI 4.36-8.95%)          |
| Excluding Lewit (35-49)                  | 6.87% (95% CI 4.87-9.18%)          |
| Excluding Liedholm and Sioberg (14-40)   | 7.29% (95% CI 5.39-9.45%)          |
| Excluding Mishell et al. (14-33)         | 6.55% (95% CI 4.47-8.99%)          |

#### TCu 200 discontinuation at 12 months due to pregnancy – sensitivity analysis

|                                                         |                                    |
|---------------------------------------------------------|------------------------------------|
| <b>Subgroup 1 (Nulliparous women aged &lt;30 years)</b> | <b>(2.19% (95% CI 1.47-3.05%))</b> |
| Excluding Lewit (15-19)                                 | 2.27% (95% CI 1.82-2.75%)          |
| Excluding Lewit (20-24)                                 | 1.83% (95% CI 1.35-2.39%)          |
| Excluding Lewit (25-29)                                 | 2.63% (95% CI 2.13-3.18%)          |
|                                                         |                                    |
| <b>Subgroup 2 (Nulliparous women of any age)</b>        | <b>(1.15% (95% CI 0.54-1.95%))</b> |
| Excluding Roy et al. (14-33)                            | 1.07% (95% CI 0.40-1.99%)          |
| Excluding Luukkainen et al. (19-35)                     | 0.96% (95% CI 0.38-1.75%)          |
| Excluding Larsen et al. (15-44)                         | 1.18% (95% CI 0.53-2.05%)          |
| Excluding Ostergard and Gunning (18-34)                 | 1.31% (95% CI 0.65-2.16%)          |
| Excluding Lewit (30-34)                                 | 1.35% (95% CI 0.70-2.18%)          |
| Excluding Lewit (35-49)                                 | 1.31% (95% CI 0.62-2.20%)          |
| Excluding Liedholm and Sioberg (14-40)                  | 1.00% (95% CI 0.42-1.78%)          |
| Excluding Mishell et al. (14-33)                        | 1.07% (95% CI 0.40-1.99%)          |
|                                                         |                                    |
| <b>Overall effect size (all studies)</b>                | <b>(1.49% (95% CI 0.96-2.13%))</b> |
| Excluding Lewit (15-19)                                 | 1.39% (95% CI 0.81-2.09%)          |
| Excluding Lewit (20-24)                                 | 1.34% (95% CI 0.83-1.94%)          |
| Excluding Lewit (25-29)                                 | 1.48% (95% CI 0.87-2.22%)          |
| Excluding Roy et al. (14-33)                            | 1.46% (95% CI 0.89-2.16%)          |
| Excluding Luukkainen et al. (19-35)                     | 1.40% (95% CI 0.83-2.09%)          |
| Excluding Larsen et al. (15-44)                         | 1.53% (95% CI 0.98-2.19%)          |
| Excluding Ostergard and Gunning (18-34)                 | 1.62% (95% CI 1.07-2.26%)          |
| Excluding Lewit (30-34)                                 | 1.69% (95% CI 1.18-2.29%)          |
| Excluding Lewit (35-49)                                 | 1.64% (95% CI 1.10-2.28%)          |
| Excluding Liedholm and Sioberg (14-40)                  | 1.41% (95% CI 0.88-2.06%)          |
| Excluding Mishell et al. (14-33)                        | 1.46% (95% CI 0.89-2.16%)          |
