# Supplementary material for: Systematic review of copper intrauterine contraception continuation in young nulliparous women based on intrauterine device type
Source: HighWire-hosted journal article supplement (doi:10.1136/bmjopen-2021-060606), 2022-10-01
Supplement: bmjopen-2021-060606supp009_data_supplement.pdf [file bmjopen-2021-060606supp009_data_supplement.pdf]

Supplementary material – TCu 200 discontinuation rates due to pain/bleeding, expulsion and pregnancy

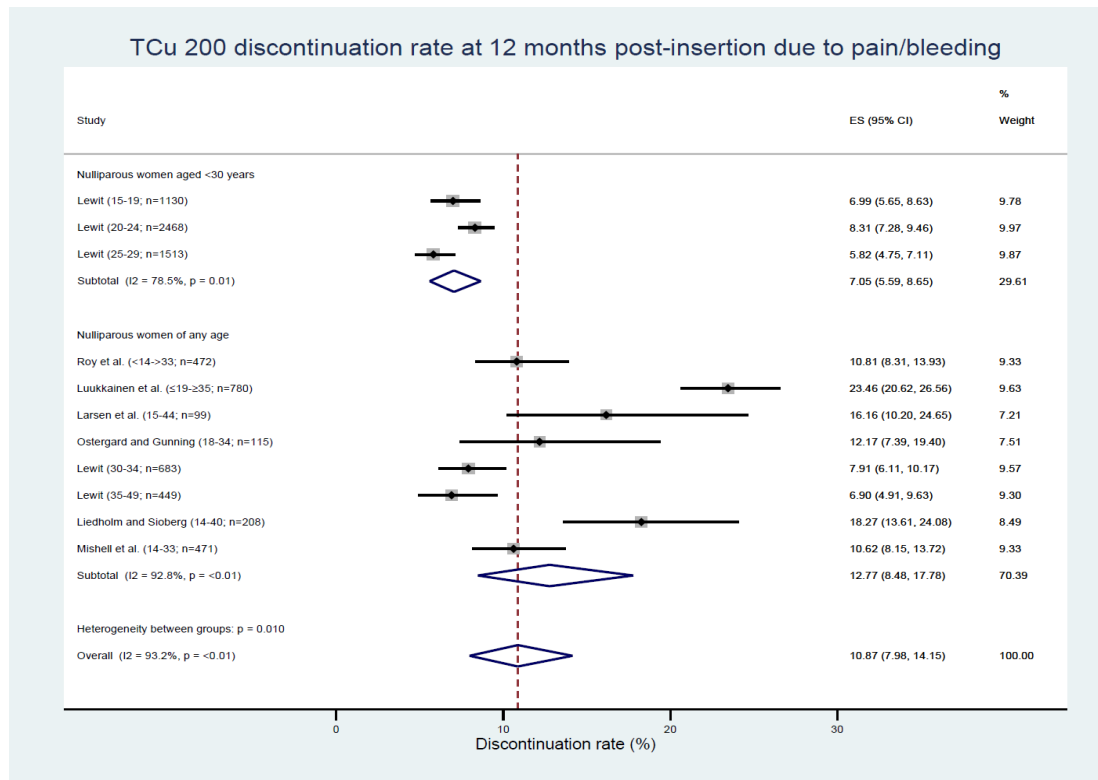

Figure 1 - TCu 200 discontinuation at 12 months due to pain/bleeding

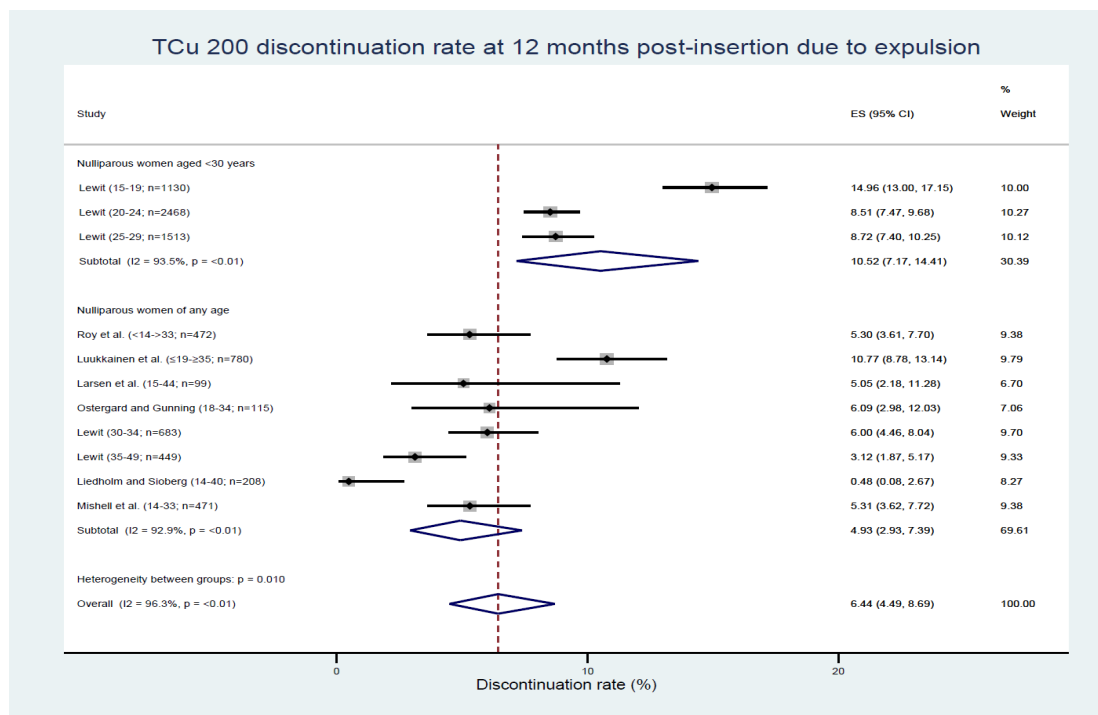

Figure 2 – TCu 200 discontinuation at 12 months due to expulsion

Supplementary material – TCu 200 discontinuation rates due to pain/bleeding, expulsion and pregnancy

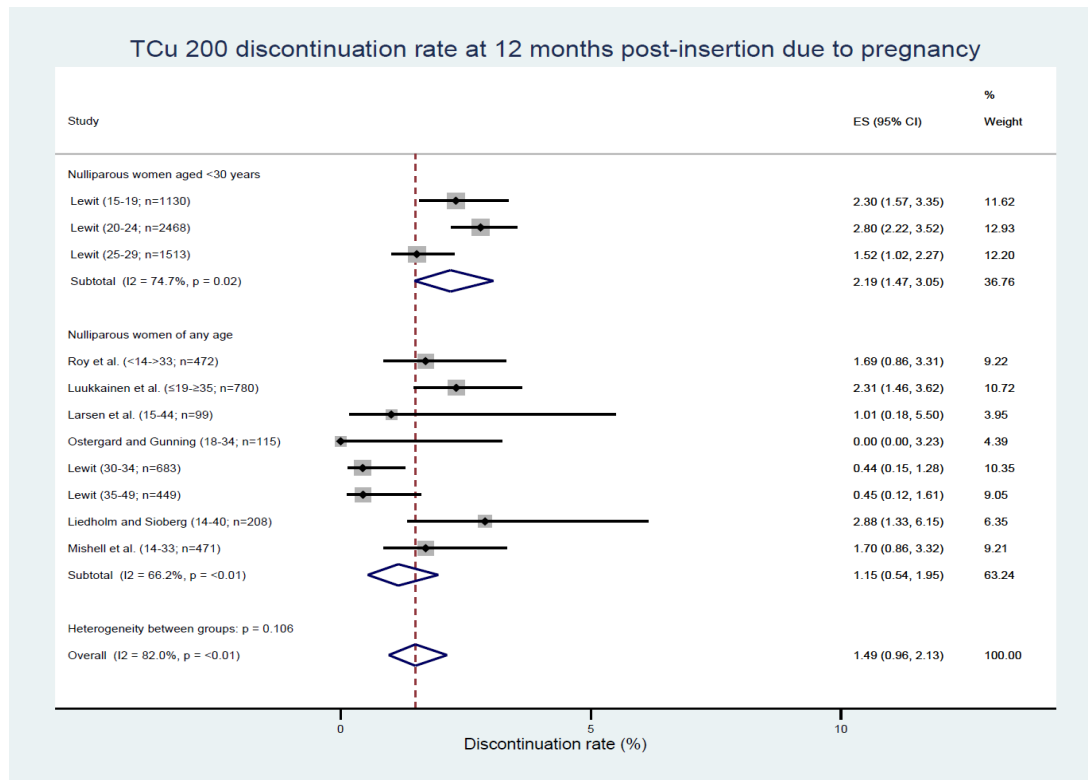

Figure 3 – TCu 200 discontinuation at 12 months due to pregnancy
